# Supplementary material
Source: PubMed Central journal article supplement (PMC7761158)
Supplement: 13054_2020_3369_MOESM1_ESM.pdf [file 13054_2020_3369_MOESM1_ESM.pdf]

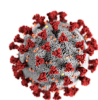

# PoCUS4COVID

Expedited Delphi consensus process on the use of  
Point of Care UltraSound for COVID Diagnosis and Management

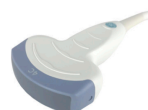

| N  | Family Name    | Name         | Gender | Country        | Specialty                      |
|----|----------------|--------------|--------|----------------|--------------------------------|
| 1  | HUSSAIN        | Arif         | M      | KSA            | INTENSIVE CARE - ANESTHESIA    |
| 2  | ALSAAWI        | Abdulmohsen  | M      | KSA            | EMERGENCY MEDICINE             |
| 3  | SALAMAH        | Majid        | M      | KSA            | EMERGENCY MEDICINE             |
| 4  | NERI           | Luca         | M      | KSA            | EMERGENCY MEDICINE             |
| 5  | ARABI          | Yaseen       | M      | KSA            | INTENSIVE CARE                 |
| 6  | GRACI          | Carmela      | F      | ITALY          | PREHOSPITAL EMERGENCY MEDICINE |
| 7  | CORRADI        | Francesco    | M      | ITALY          | EMERGENCY MEDICINE             |
| 8  | PIVETTA        | Emanuele     | M      | ITALY          | EMERGENCY MEDICINE             |
| 9  | COPETTI        | Roberto      | M      | ITALY          | EMERGENCY MEDICINE             |
| 10 | NAZERIAN       | Peiman       | M      | ITALY          | EMERGENCY MEDICINE             |
| 11 | TAVAZZI        | Guido        | M      | ITALY          | INTENSIVE CARE - ANESTHESIA    |
| 12 | MOJOLI         | Francesco    | M      | ITALY          | INTENSIVE CARE - ANESTHESIA    |
| 13 | BENDJELID      | Karim        | M      | SWITZERLAND    | INTENSIVE CARE - ANESTHESIA    |
| 14 | VIA            | Gabriele     | M      | SWITZERLAND    | INTENSIVE CARE - ANESTHESIA    |
| 15 | NESKOVIC       | Aleksandar N | M      | SERBIA         | CARDIOLOGY                     |
| 16 | PROSEN         | Gregor       | M      | SLOVENIA       | PREHOSPITAL EMERGENCY MEDICINE |
| 17 | BALIK          | Martin       | M      | CZECK REPUBLIC | INTENSIVE CARE - ANESTHESIA    |
| 18 | POELAERT       | Jan          | M      | BELGIUM        | INTENSIVE CARE - ANESTHESIA    |
| 19 | MEINERI        | Massimiliano | M      | GERMANY        | INTENSIVE CARE - ANESTHESIA    |
| 20 | BREITKREUTZ    | Roul         | M      | GERMANY        | EMERGENCY MEDICINE             |
| 21 | LAURSEN        | Christian    | M      | DENMARK        | PULMONOLOGY                    |
| 22 | BOUHEMAD       | Belaid       | M      | FRANCE         | INTENSIVE CARE - ANESTHESIA    |
| 23 | PETROVIC       | Tomislav     | M      | FRANCE         | PREHOSPITAL EMERGENCY MEDICINE |
| 24 | ZIELESKIEWICZ  | Laurent      | M      | FRANCE         | INTENSIVE CARE                 |
| 25 | PRICE          | Susanna      | F      | UK             | INTENSIVE CARE - CARDIOLOGY    |
| 26 | WONG           | Adrian       | M      | UK             | INTENSIVE CARE - ANESTHESIA    |
| 27 | CONNOLLY       | Jim          | M      | UK             | EMERGENCY MEDICINE             |
| 28 | NOGUE          | Ramon        | M      | SPAIN          | EMERGENCY MEDICINE             |
| 29 | TUNG-CHEN      | Yale         | M      | SPAIN          | EMERGENCY MEDICINE             |
| 30 | VILLEN         | Tomas        | M      | SPAIN          | EMERGENCY MEDICINE             |
| 31 | WELLS          | Mike         | M      | SOUTH AFRICA   | EMERGENCY MEDICINE             |
| 32 | GOFFI          | Alberto      | M      | CANADA         | INTENSIVE CARE                 |
| 33 | ROLA           | Philippe     | M      | CANADA         | EMERGENCY MEDICINE             |
| 34 | MA             | Irene        | F      | CANADA         | INTERNAL MEDICINE              |
| 35 | DENAULT        | André        | M      | CANADA         | INTENSIVE CARE - ANESTHESIA    |
| 36 | HOPPMANN       | Richard      | M      | USA            | INTERNAL MEDICINE              |
| 37 | NOBLE          | Vicki        | F      | USA            | EMERGENCY MEDICINE             |
| 38 | DEAN           | Anthony      | M      | USA            | EMERGENCY MEDICINE             |
| 39 | MELNIKER       | Larry        | M      | USA            | EMERGENCY MEDICINE             |
| 40 | LANSPA         | Micheal      | M      | USA            | INTENSIVE CARE                 |
| 41 | LIU            | Rachel       | F      | USA            | EMERGENCY MEDICINE             |
| 42 | NELSON         | Brett        | M      | USA            | EMERGENCY MEDICINE             |
| 43 | PEREIRA        | Elmo         | M      | BRASIL         | INTENSIVE CARE                 |
| 44 | PAZELI         | José         | M      | BRASIL         | INTERNAL MEDICINE              |
| 45 | CALDERON       | Juan         | M      | MEXICO         | INTENSIVE CARE                 |
| 46 | HURTADO        | Laura        | F      | ARGENTINA      | INTERNAL MEDICINE              |
| 47 | MONTORFANO     | Miguel       | M      | ARGENTINA      | EMERGENCY MEDICINE             |
| 48 | BLANCO         | Pablo        | M      | ARGENTINA      | INTENSIVE CARE                 |
| 49 | BARCA          | Diego        | M      | ARGENTINA      | EMERGENCY MEDICINE             |
| 50 | RODRIGUEZ      | Shalim       | M      | PERÚ           | EMERGENCY MEDICINE             |
| 51 | BRAVO-FIGUEROA | Pablo        | M      | CHILE          | INTENSIVE CARE                 |
| 52 | KAMEDA         | Toru         | M      | JAPAN          | INTENSIVE CARE                 |
| 53 | LEE            | Frances      | M      | SINGAPORE      | EMERGENCY MEDICINE             |
| 54 | OSMAN          | Adi          | M      | MALAYSIA       | EMERGENCY MEDICINE             |
| 55 | ABDULWAHAB     | Mahatar      | M      | MALAYSIA       | EMERGENCY MEDICINE             |
| 56 | XIAOTING       | Wang         | M      | CHINA          | INTENSIVE CARE                 |
| 57 | ZHEN           | Wang         | M      | CHINA          | INTERNAL MEDICINE              |
| 58 | HA             | Young-Rock   | M      | SOUTH KOREA    | EMERGENCY MEDICINE             |
| 59 | GOVIL          | Deepak       | M      | INDIA          | INTENSIVE CARE                 |
| 60 | ROYSE          | Colin        | M      | AUSTRALIA      | ANESTHESIA                     |

## LITERATURE SEARCH

A literature search of Pubmed, Pubmed Central, Embase, Scopus and Cochrane library databases was conducted by 2 independent researchers for the period Jan 1<sup>st</sup> 2020-August 1<sup>st</sup> 2020 to identify all publications on point of care ultrasound in COVID-19 adult patients, using English language restriction, and the following MeSH query: ((“lung” AND “ultrasound”) OR “echocardiography” OR “Focused cardiac ultrasound” OR “point of care ultrasound” OR “venous ultrasound”) AND (“COVID-19” OR “SARS-CoV2”). Non-pertinent findings were discarded. The references of relevant papers were also scanned for any missed paper. Duplicates were removed. An additional search of pre-print publications was made through ResearchGate, preprint online repositories and social medias.

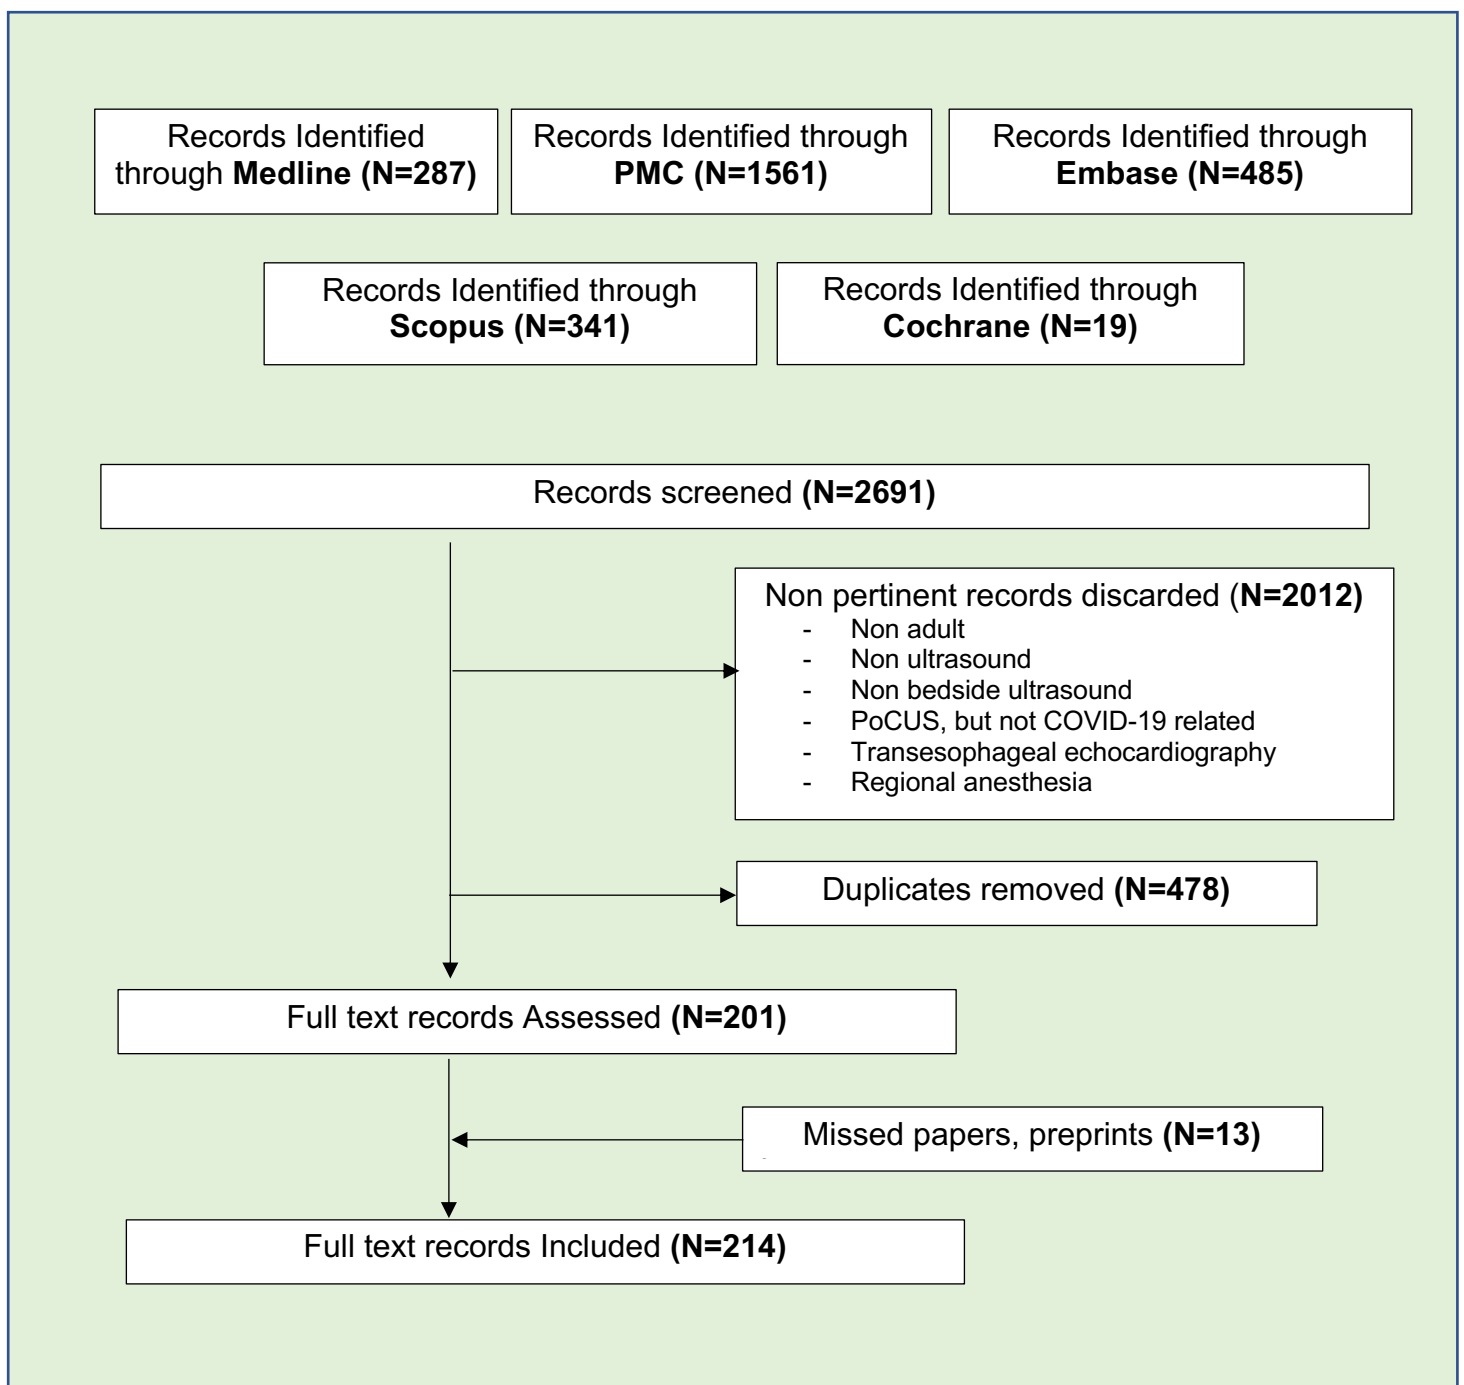

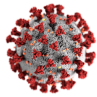

# PoCUS4COVID

Expedited Delphi consensus process on the use of Point of Care UltraSound for COVID Diagnosis and Management

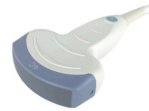

|     |                     |                                                                                                                                                                                           |                                   |      |
|-----|---------------------|-------------------------------------------------------------------------------------------------------------------------------------------------------------------------------------------|-----------------------------------|------|
| 1   | Abramowicz JA.      | WOFUMB POSITION STATEMENT HOW TO PERFORM A SAFE ULTRASOUND EXAMINATION AND CLEAN EQUIPMENT IN THE CONTEXT OF COVID-19                                                                     | ULTRASOUND MED BIOL               | 2020 |
| 2   | Abrams E.           | Lung Ultrasound in COVID-19                                                                                                                                                               | ACEP                              | 2020 |
| 3   | Abrams ER.          | POINT-OF-CARE ULTRASOUND IN THE EVALUATION OF COVID-19                                                                                                                                    | J EMERG MED                       | 2020 |
| 4   | Akl EA              | Use of Chest Imaging in the Diagnosis and Management of COVID-19/ a WHO Rapid Advice Guide                                                                                                | RADIOLOGY                         | 2020 |
| 5   | Alkafaji M.         | Visual Case Discussion. A Case of Lung Ultrasound Findings in a 73-year-old male with COVID-19                                                                                            | VIS J EMERG MED                   | 2020 |
| 6   | Alinovi M.          | Lung ultrasound may support diagnosis and monitoring of COVID-19 pneumonia                                                                                                                | ULTRASOUND MED BIOL               | 2020 |
| 7   | Anile A             | COVID-19 the new ultrasound alphabet in SARS-CoV-2 era                                                                                                                                    | ANESTH ANALG                      | 2020 |
| 8   | Antunez-Montes OY.  | RATIONALE FOR THE ROUTINE APPLICATION OF LUNG ULTRASOUND IN THE MANAGEMENT OF CORONAVIRUS DISEASE 2019 (COVID-19) PATIENTS IN MIDDLE- TO LOW-INCOME COUNTRIES                             | ULTRASOUND MED BIOL               | 2020 |
| 9   | Antunez-Montes OY.  | Routine use of Point-of-Care lung ultrasound during the COVID-19 pandemic                                                                                                                 | MED INTENSIVE                     | 2020 |
| 10  | Artifoni M.         | Systematic assessment of venous thromboembolism in COVID-19 patients receiving thromboprophylaxis/ incidence and role of D-dimer as predictive factors                                    | J THROMB THROMBOL                 | 2020 |
| 11  | Avinash A.          | Lung Ultrasound in COVID-19                                                                                                                                                               | AFR J EM MED                      | 2020 |
| 12  | Baker K.            | Lung ultrasound in a COVID pandemic - choosing wisely                                                                                                                                     | AUSTRALAS J ULTRASOUND MED        | 2020 |
| 13  | Bar S.              | Association of lung ultrasound images with COVID-19 infection in an emergency room cohort                                                                                                 | ANAESTH                           | 2020 |
| 14  | Benchoufi M.        | Lung injury in patients with or suspected COVID-19 / a comparison between lung ultrasound and chest CT-scanner severity assessments, an observational study                               | medRxiv                           | 2020 |
| 15  | Bhandari S.         | Evaluation of Clinico-Radiological Profile and Correlation with Ultrasonography of the Chest in Coronavirus Disease 2019 Pneumonia                                                        | INDIAN J MED SPEC                 | 2020 |
| 16  | Bhayana R.          | Abdominal Imaging Findings in COVID-19/ Preliminary Observations                                                                                                                          | RADIOLOGY                         | 2020 |
| 17  | Bhimji-Hewitt S.    | Can the Use of Bedside Lung Ultrasound Reduce Transmission Rates in The Case of The COVID-19 Patient? - A Narrative Review                                                                | POCUS                             | 2020 |
| 18  | Bhoi S.             | Point-of-care ultrasound in COVID-19 pandemic                                                                                                                                             | POSTGRAD MED J                    | 2020 |
| 19  | Boero E.            | The role of lung ultrasonography in COVID-19 disease management                                                                                                                           | JACEP                             | 2020 |
| 20  | Bonadia N.          | Lung Ultrasound findings are associated with mortality and need of intensive care admission in COVID-19 patients evaluated in the Emergency Department                                    | ULTRASOUND MED BIOL               | 2020 |
| 21  | Bom J.              | POCOVID-Net/ AUTOMATIC DETECTION OF COVID-19 FROM A NEW LUNG ULTRASOUND IMAGING DATASET (POCUS) arXiv                                                                                     | arXiv                             | 2020 |
| 22  | Buda N.             | Consensus of the Study Group for Point-of-Care Lung Ultrasound in the intensive care management of COVID-19 patients                                                                      | ANAESTHESIOLOG INTENSIVE THER     | 2020 |
| 23  | Buda N.             | Lung ultrasound in the diagnosis of COVID-19 infection - A case series and review of the literature                                                                                       | ADVANC MED SCI                    | 2020 |
| 24  | Buonsenso D.        | Clinical role of lung ultrasound for the diagnosis and monitoring of COVID-19 pneumonia in pregnant women                                                                                 | ULTRASOUND OBSTET GYNECOL         | 2020 |
| 25  | Buonsenso D.        | COVID-19 outbreak: less stethoscope, more ultrasound                                                                                                                                      | LANCET RESP                       | 2020 |
| 26  | Buonsenso D.        | Effectiveness of a "fast lung ultrasound teaching program" for gynecologists/obstetricians dealing with pregnant women with suspicion of COVID-19 infection                               | ULTRASOUND OBSTET GYNECOL         | 2020 |
| 27  | Buonsenso D.        | Point-of-Care Lung Ultrasound findings in novel coronavirus disease-19 pneumonias; a case report and potential applications during COVID-19 outbreak                                      | EUR REV MED PHARMACOL SCI         | 2020 |
| 28  | Cameli M.           | Safe performance of echocardiography during the COVID-19 pandemic_ a practical guide                                                                                                      | REV CARDIOVASC RES                | 2020 |
| 29  | Chen L.             | Novel Coronavirus-Induced Right Ventricular Failure and Point of Care Echocardiography; A Case Report                                                                                     | CARDIOLOGY                        | 2020 |
| 30  | Chliem A.           | Pick Up Your Probes A Call for Clinically Oriented Point-of-Care Ultrasound Research in COVID-19                                                                                          | J ULTRASOUND MED                  | 2020 |
| 31  | Cho YJ.             | Lung ultrasound for early diagnosis and severity assessment of pneumonia in patients with coronavirus disease 2019                                                                        | KOREAN J INTERN MED               | 2020 |
| 32  | Chun-Héi Cheung J.  | POCUS in COVID-19/ pearls and pitfalls                                                                                                                                                    | LANCET RESP MED                   | 2020 |
| 33  | Churchill TW.       | Echocardiographic Features of COVID-19 Illness and Association with Cardiac Biomarkers                                                                                                    | JASE                              | 2020 |
| 34  | Consoil L.          | 2019 novel coronavirus (COVID-19) pneumonia complications/ the importance of lung ultrasound                                                                                              | J ULTRASOUND                      | 2020 |
| 35  | Convissar D.        | Application of Lung Ultrasound During the Coronavirus Disease 2019 Pandemic; A Narrative Review                                                                                           | ANESTH ANALG                      | 2020 |
| 36  | Copetti R.          | First comes the A, then the B; what we learned from the COVID-19 outbreak                                                                                                                 | EUR J INTERN MED                  | 2020 |
| 37  | Cosyns B.           | The role of cardiovascular imaging for myocardial injury in hospitalized COVID-19 patients                                                                                                | EUR HEART J CARDIOVASC IMAGING    | 2020 |
| 38  | Cui S.              | Prevalence of venous thromboembolism in patients with severe novel coronavirus pneumonia                                                                                                  | J THROMB HAEMOST                  | 2020 |
| 39  | Danzl GB.           | Acute pulmonary embolism and COVID-19 pneumonia/ a random association?                                                                                                                    | EUR HEART J                       | 2020 |
| 40  | Dargent A.          | Lung ultrasound score to monitor COVID-19 pneumonia progression in patients with ARDS                                                                                                     | PLOS ONE                          | 2020 |
| 41  | Davoodi L.          | COVID-19 Presented With Deep Vein Thrombosis; An Unusual Presenting                                                                                                                       | J INVEST MED HIGH IMPACT CASE REP | 2020 |
| 42  | Demelo-Rodriguez P. | Incidence of asymptomatic deep vein thrombosis in patients with COVID-19 pneumonia and elevated D-dimer levels                                                                            | THROMB RES                        | 2020 |
| 43  | Denault AY.         | A proposed lung ultrasound and phenotypic algorithm for the care of COVID-19 patients with acute respiratory failure                                                                      | CAN J ANESTH                      | 2020 |
| 44  | Deng Q.             | Suspected myocardial injury in patients with COVID-19/ Evidence from front-line clinical observation in Wuhan, China                                                                      | INTERN J CARDIOL                  | 2020 |
| 45  | Deng Q.             | Semiquantitative lung ultrasound scores in the evaluation and follow-up of critically ill patients with COVID-19/ a single-center study                                                   | ACTA RADIOL                       | 2020 |
| 46  | Di Serafino M.      | The lung ultrasound: facts or artifacts? In the era of COVID-19 outbreak                                                                                                                  | RADIOL MED                        | 2020 |
| 47  | Dong D.             | The role of imaging in the detection and management of COVID-19; a review                                                                                                                 | IEEE XPLOR                        | 2020 |
| 48  | Drake DH.           | Echocardiography in Pandemic; Front-Line Perspective, Expanding Role of Ultrasound, and Ethics of Resource Allocation                                                                     | JASE                              | 2020 |
| 49  | Dubois-Silva A.     | Pulmonary embolism and screening for concomitant proximal deep vein thrombosis in noncritically ill hospitalized patients with coronavirus disease 2019                                   | INTERNAL EM MED                   | 2020 |
| 50  | Ducos G.            | "No dose" lung ultrasound correlation with "low dose" CT scan for early diagnosis of SARS-CoV-2 pneumonia                                                                                 | INTENSIVE CARE MED                | 2020 |
| 51  | Dudea S.            | Ultrasonography and SARS-CoV 2 infection; a review of what we know and do not yet know                                                                                                    | MED ULTRASON                      | 2020 |
| 52  | Dugar S.            | Spontaneous echo contrast in venous ultrasound of severe COVID-19 patients                                                                                                                | INTENSIVE CARE MED                | 2020 |
| 53  | Duggan NM.          | BEST PRACTICE RECOMMENDATIONS FOR POINT-OF-CARE LUNG ULTRASOUND IN PATIENTS WITH SUSPECTED COVID-19                                                                                       | ULTRASOUND EM MED                 | 2020 |
| 54  | Duggan NM.          | Using Lung Point-of-care Ultrasound in Suspected COVID-19; Case Series and Proposed Triage Algorithm                                                                                      | CLIN PRACT CASES EM MED           | 2020 |
| 55  | Dweck MR.           | Global evaluation of echocardiography in patients with COVID-19                                                                                                                           | EUR HEART J CARDIOVASC IMAGING    | 2020 |
| 56  | Farrow II R.        | Early Multi-organ Point-of-Care Ultrasound Evaluation of Respiratory Distress During SARS-CoV-2 Outbreak; Case Report                                                                     | CLIN PRACT CASES EM MED           | 2020 |
| 57  | Fiala MJ.           | Ultrasound in COVID-19; a timeline of ultrasound findings in relation to CT                                                                                                               | CLIN RADIOL                       | 2020 |
| 58  | Flower L.           | The Use of Point-of-Care Lung Ultrasound and Echocardiography in the Management of Coronavirus Disease 2019 (COVID-19)                                                                    | J CARDIOTHORAC VASC ANESTH        | 2020 |
| 59  | Fox S.              | Point-of-care ultrasound and COVID-19                                                                                                                                                     | CLEV CLIN MED J                   | 2020 |
| 60  | Gackowski A.        | Echocardiography during the coronavirus disease 2019 (COVID-19) pandemic; expert opinion of the Working Group on Echocardiography of the Polish Cardiac Society                           | KARDIOLOGIA POLSKA                | 2020 |
| 61  | Gargani L.          | Why, when, and how to use lung ultrasound during the COVID-19 pandemic/ enthusiasm and caution                                                                                            | EUR HEART J CV IMAGING            | 2020 |
| 62  | Giannini A.         | Lung ultrasound for pregnant women admitted to ICU for Covid-19 pneumonia                                                                                                                 | MINERVA ANESTH                    | 2020 |
| 63  | Goldsmith AJ.       | Remodeling Point-of-care Ultrasound Education in the Era of COVID-19                                                                                                                      | AEM EDU AND TRAINING              | 2020 |
| 64  | Gravell RJ.         | Radiological manifestations of COVID-19; key points for the physician                                                                                                                     | BR J HOSP MED                     | 2020 |
| 65  | Guaracino F.        | Lung, Heart, Vascular, and Diaphragm Ultrasound Examination of COVID-19 Patients; A Comprehensive Approach                                                                                | J CARDIOTHORAC VASC ANESTH        | 2020 |
| 66  | AJUM                | Guidelines for Cleaning and Preparing External- and Internal-Use Ultrasound Transducers and Equipment Between Patients as well as Safe Handling and Use of Ultrasound Coupling Gel        | AJUM                              | 2020 |
| 67  | Haaksma ME.         | LUS findings in patients with novel SARS-CoV2                                                                                                                                             | medRxiv                           | 2020 |
| 68  | Hankins A.          | Point of care lung ultrasound is useful when screening for Covid-19 in Emergency Department patients                                                                                      | medRxiv                           | 2020 |
| 69  | Hasanin A.          | Evaluation of fluid responsiveness during COVID-19 pandemic/ what are the remaining choices?                                                                                              | J ANESTH                          | 2020 |
| 70  | Helweg M.           | Lung ultrasound and computed tomography to monitor COVID-19 pneumonia in critically ill patients/ a two-center prospective cohort study                                                   | RES SQUARE preprint               | 2020 |
| 71  | Helms J.            | High risk of thrombosis in patients in severe SARS-CoV-2 infection; a multicenter prospective cohort study                                                                                | INTENSIVE CARE MED                | 2020 |
| 72  | Hu H.               | Coronavirus fulminant myocarditis treated with glucocorticoid and human immunoglobulin                                                                                                    | EUR HEART J                       | 2020 |
| 73  | Hua A.              | Life-threatening cardiac tamponade complicating myo-pericarditis in COVID-19                                                                                                              | EUR HEART J                       | 2020 |
| 74  | Huang J.            | Development of a COVID-19 Point-of-Care Ultrasound Protocol                                                                                                                               | JASE                              | 2020 |
| 75  | Huang Y.            | A preliminary study on the ultrasonic manifestations of peripulmonary lesions of non-critical novel coronavirus pneumonia (COVID-19)                                                      | medRxiv                           | 2020 |
| 76  | Inchingolo R.       | The diagnosis of pneumonia in a pregnant woman with coronavirus disease 2019 using maternal lung ultrasound                                                                               | AM J OBSTETRICS                   | 2020 |
| 77  | Inciardi RM.        | Cardiac Involvement in a Patient With Coronavirus Disease 2019 (COVID-19)                                                                                                                 | JAMA CARDIOL                      | 2020 |
| 78  | Jain SS.            | Indications and Findings on Transthoracic Echocardiography in COVID-19                                                                                                                    | JASE                              | 2020 |
| 79  | Johri AM.           | ASE Statement on PoCUS in COVID-19                                                                                                                                                        | JASE                              | 2020 |
| 80  | Jung EM.            | Contrast enhanced ultrasonography (CEUS) to detect abdominal microcirculatory disorders in severe cases of COVID-19 infection; First experience                                           | CLIN HEMORHEOL MICROCIRC          | 2020 |
| 81  | Kalafat E.          | Lung ultrasound and computed tomographic findings in pregnant woman with COVID-19                                                                                                         | ULTRASOUND OBSTET GYNECOL         | 2020 |
| 82  | Kaminski A.         | Answering to the Call of Critically Ill Patients/ Limiting Sonographer Exposure to COVID-19 with Focused Protocols                                                                        | JASE                              | 2020 |
| 83  | Karyanna PT.        | Apical Takotsubo Cardiomyopathy in a COVID-19 Patient Presenting with Stroke; A Case Report and Pathophysiologic Insights                                                                 | AM J MED CASE REPORTS             | 2020 |
| 84  | Karyanna PT.        | Thrombus in Transit and Impending Pulmonary Embolism Detected on POCUS in a Patient with COVID-19 Pneumonia                                                                               | AM J MED CASE REPORTS             | 2020 |
| 85  | Khalil N.           | Lung Ultrasound in COVID-19 Pneumonia; Prospects and Limitations                                                                                                                          | ACADEMIC RADIOLOGY                | 2020 |
| 86  | Kiamanesh O.        | Lung Ultrasound for Cardiologists in the Time of COVID-19                                                                                                                                 | CAN J CARDIOL                     | 2020 |
| 87  | Kim DJ.             | Just, the facts, recommendations, on_pointofcare_ultrasound_use_and_machine_infection_control_during_the_coronavirus_disease_2019_pandemic                                                | CJEM                              | 2020 |
| 88  | Kirkpatrick AW.     | Lung ultrasonography in a woman with COVID-19/ This examination could be remote                                                                                                           | CMAJ                              | 2020 |
| 89  | Klok FA.            | Incidence of thrombotic complications in critically ill ICU patients with COVID-19                                                                                                        | THROMB RES                        | 2020 |
| 90  | Koleilat I.         | Clinical characteristics of acute lower extremity deep venous thrombosis diagnosed by duplex in patients hospitalized for coronavirus disease 2019                                        | J VASC SURG VEN LYMPH DISORDERS   | 2020 |
| 91  | Koratata A.         | Need for Objective Assessment of Volume Status in Critically Ill Patients with COVID-19; The Tri-POCUS Approach                                                                           | CARDIORENAL MED                   | 2020 |
| 92  | Kraemer AXE.        | POCUS series; point-of-care lung ultrasound in patients with COVID-19                                                                                                                     | NETH J CRIT CARE                  | 2020 |
| 93  | Kulkarni S.         | Point-of-care lung ultrasound in intensive care during the COVID-19 pandemic                                                                                                              | CLIN RADIOL                       | 2020 |
| 94  | Kumar A.            | Lung Ultrasound Findings in Patients Hospitalized with Covid-19                                                                                                                           | medRxiv                           | 2020 |
| 95  | Lazzeri C.          | Pulmonary embolism and screening for concomitant proximal deep vein thrombosis in noncritically ill hospitalized patients with coronavirus disease 2019                                   | INTERNAL EM MED                   | 2020 |
| 96  | Lepré G.            | The emerging role of lung ultrasound in COVID-19 pneumonia                                                                                                                                | EUR J RHEUMATOLOGY                | 2020 |
| 97  | Li J.               | Response to letter to the editor/ "Lung Ultrasound early detection and monitoring in Covid-19 Pneumonia; fact and fiction"                                                                | QJM                               | 2020 |
| 98  | Li J.               | Serial bedside lung ultrasonography in a critically ill COVID-19 patient                                                                                                                  | QJM                               | 2020 |
| 99  | Liu R.              | Ultrasound on the Frontlines of COVID-19/ Report From an International Webinar                                                                                                            | ACAD EMERG MED                    | 2020 |
| 100 | Liu X.              | Critical Care Ultrasonography and Its Application for COVID-19                                                                                                                            | ADV ULTRASOUND DIAG THER          | 2020 |
| 101 | Liljors JF.         | High incidence of venous thromboembolic events in anticoagulated severe COVID-19 patients                                                                                                 | J THROMB HAEMOST                  | 2020 |
| 102 | Lodigiani C.        | Venous and arterial thromboembolic complications in COVID-19 patients T admitted to an academic hospital in Milan, Italy                                                                  | THROMB RES 2020                   | 2020 |
| 103 | Lomoro P.           | COVID-19 pneumonia manifestations at the admission on chest ultrasound, radiographs, and CT; single-center study and comprehensive radiologic literature review                           | EUR J RADIOL OPEN                 | 2020 |
| 104 | Lomchanch A.        | Venous thromboembolism in critically ill patients with COVID-19/ Results of a screening study for deep vein thrombosis                                                                    | RES PRACT THROMB HAEMOST          | 2020 |
| 105 | Lu W.               | A Clinical Study of Noninvasive Assessment of Lung Lesions in Patients with Coronavirus Disease-19 (COVID-19) by Bedside Ultrasound                                                       | ULTRASCHALL MED                   | 2020 |
| 106 | Lu W.               | Response to Letter to the editor/ Lung Ultrasound in COVID-19 Patients - More Shadows Than Information - Letter to the Editor on the Article "W. LU et al. Ultrashall in Med. 2020 Apr 15 | ULTRASCHALL MED                   | 2020 |
| 107 | Ma IWY.             | Canadian Internal Medicine Ultrasound (CIMUS) Recommendations Regarding Internal Medicine Point-of-Care Ultrasound (POCUS) use during Coronavirus (COVID-19) pandemic                     | CAN J GEN INTERN MED              | 2020 |
| 108 | Ma J.               | Critical Care Ultrasound. A Necessary and Mandatory Tool for Novel Coro-navirus Pneumonia                                                                                                 | ADVANCED ULTRASOUND DIAG THER     | 2020 |
| 109 | Manivel V.          | CLUE/ COVID-19 Lung Ultrasound in Emergency Department                                                                                                                                    | EMERG MED AUSTRALAS               | 2020 |
| 110 | Mathews BK.         | Clinical Progress Note/ Point-of-Care Ultrasound Applications in COVID-19                                                                                                                 | J HOSP MED                        | 2020 |
| 111 | McDemott C.         | Combating COVID-19: Is Ultrasound an Important Piece in the Diagnostic Puzzle?                                                                                                            | RESEARCHGATE Preprint             | 2020 |
| 112 | McMahon SR.         | Tablet-Based Limited Echocardiography to Reduce Sonographer Scan and Decontamination Time during the COVID-19 Pandemic                                                                    | JASE                              | 2020 |
| 113 | Mendel J.           | Current Concepts Imaging in COVID-19 and the Challenges for Low and Middle Income Countries                                                                                               | J GLOBAL RADIOL                   | 2020 |
| 114 | Middelborg S.       | Incidence of venous thromboembolism in hospitalized patients with COVID-19                                                                                                                | J THROMB HAEMOSTH                 | 2020 |
| 115 | McMahon SR.         | Tablet-Based Limited Echocardiography to Reduce Sonographer Scan and Decontamination Time during the COVID-19 Pandemic                                                                    | JASE                              | 2020 |
| 116 | Mendel J.           | Current Concepts Imaging in COVID-19 and the Challenges for Low and Middle Income Countries                                                                                               | J GLOBAL RADIOL                   | 2020 |
| 117 | Michard F.          | Haemodynamic Monitoring and Management in COVID-19 Intensive Care Patients/ An International Survey                                                                                       | ANESTH CRIT CARE MED              | 2020 |



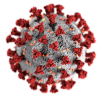

# PoCUS4COVID

Expedited Delphi consensus process on the use of Point of Care UltraSound for COVID Diagnosis and Management

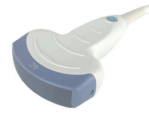

|     |                    |                                                                                                                                                                                                                  |                                |      |
|-----|--------------------|------------------------------------------------------------------------------------------------------------------------------------------------------------------------------------------------------------------|--------------------------------|------|
| 118 | Middelkamp S.      | Incidence of venous thromboembolism in hospitalized patients with COVID-19 - J THROMB HAEMOSTH 2020.pdf                                                                                                          | J THROMB HAEMOSTH              | 2020 |
| 119 | Mojili F.          | Our recommendations for acute management of COVID-19                                                                                                                                                             | CRIT CARE                      | 2020 |
| 120 | Moller-Sorensen H. | COVID-19 Assessment with Bedside Lung Ultrasound in a Population of Intensive Care Patients Treated with Mechanical Ventilation and ECMO                                                                         | DIAGNOSTICS                    | 2020 |
| 121 | Mongodi S.         | LUNG ULTRASOUND IN PATIENTS WITH ACUTE RESPIRATORY FAILURE REDUCES CONVENTIONAL IMAGING AND HEALTH CARE PROVIDER EXPOSURE TO COVID-19                                                                            | ULTRASOUND MED BIOL            | 2020 |
| 122 | Moore S.           | Point of care and intensive care lung ultrasound; A reference guide for practitioners during COVID-19                                                                                                            | RADIOGRAPHY                    | 2020 |
| 123 | Moore LK.          | Prevention, Diagnosis, and Treatment of VTE in Patients With Coronavirus Disease 2019 CHEST Guideline and Expert Panel Report                                                                                    | CHEST                          | 2020 |
| 124 | Moro F.            | How to perform lung ultrasound in pregnant women with suspected COVID-19 - ULTRASOUND OBSTET GYNECOL 2020.pdf                                                                                                    | ULTRASOUND OBSTET GYNECOL      | 2020 |
| 125 | Mouhand FHM.       | Frequency of Abnormalities Detected by Point-of-Care Lung Ultrasound in Symptomatic COVID-19 Patients/ Systematic Review and Meta-Analysis                                                                       | AM J TROP MED HYG              | 2020 |
| 126 | Nahum J.           | Venous Thrombosis Among Critically Ill Patients With Coronavirus Disease 2019 (COVID-19)                                                                                                                         | JAMA NETWORK OPEN              | 2020 |
| 127 | Nauka PC.          | Deep venous thrombosis in a non-critically ill patient with novel COVID-19 infection                                                                                                                             | THROMB RES                     | 2020 |
| 128 | Nicoara A.         | Specific Considerations for the Protection of Patients and Echocardiography Service Providers When Performing Perioperative or Periprocedural Transesophageal Echocardiography during the 2019 Novel Coronavirus | JASE                           | 2020 |
| 129 | Nouvenne A.        | Lung Ultrasound in COVID-19 Pneumonia; Correlations with Chest CT on Hospital Admission                                                                                                                          | RESPIRATION                    | 2020 |
| 130 | Obi At.            | Practical diagnosis and treatment of suspected venous thromboembolism during COVID-19 Pandemic                                                                                                                   | J VASC SURG VEN LYMPH DIS      | 2020 |
| 131 | Omar YA.           | Routine use of Point-of-Care lung ultrasound during the COVID-19 pandemic                                                                                                                                        | MED INTENSIVA                  | 2020 |
| 132 | Osterwalder J.     | COVID-19 – More Lung Focus and Sparing Use of Stethoscope, Chest X-Ray and Lung CT                                                                                                                               | PRAXIS                         | 2020 |
| 133 | Pacilio M.         | The role of echocardiography in SARS-CoV-2 pandemic; a compromise among appropriateness, safety and clinical impact                                                                                              | MONALDI ARCH CHEST DIS         | 2020 |
| 134 | Palmeze F.         | Daily Evaluation of COVID-19 Patients Primarily Based on Lung Ultrasound/ In Times of Emergency, It's Time to Change Some Paradigms                                                                              | AM J TROP MED HYG              | 2020 |
| 135 | Para JR.           | Point-of-care Lung Ultrasound Is More Sensitive than Chest Radiograph for Evaluation of COVID-19                                                                                                                 | WEST J EM MED                  | 2020 |
| 136 | Pascarella         | The evolution of ultrasound role in COVID-19 pandemic/ from triage to screening                                                                                                                                  | ANESTH ANALG                   | 2020 |
| 137 | Pata D.            | Chest Computed Tomography and Lung Ultrasound Findings in COVID-19 Pneumonia; A Pocket Review for Non-radiologists                                                                                               | FRONT MED                      | 2020 |
| 138 | Peh WM.            | Lung ultrasound in a Singapore COVID-19 intensive care unit patient and a review of its potential clinical utility in pandemic                                                                                   | J ULTRASOUND                   | 2020 |
| 139 | Peyrony O.         | Accuracy of Emergency Department Clinical Findings for Diagnosis of Coronavirus Disease 2019                                                                                                                     | ANN EM MED                     | 2020 |
| 140 | Picard MH.         | Echocardiography in the Time of COVID-19                                                                                                                                                                         | JASE                           | 2020 |
| 141 | Pierce CW.         | Clarifying the role of lung ultrasonography in COVID-19 respiratory disease                                                                                                                                      | CMAJ                           | 2020 |
| 142 | Pileggi C.         | The Ultrasound-Guided Triage/ A New Tool for Prehospital Management of COVID-19 Pandemic                                                                                                                         | ANESTH ANALG                   | 2020 |
| 143 | Piscaglia F.       | Benefits, Open questions and Challenges of the use of Ultrasound in the COVID-19 pandemic era. The views of a panel of worldwide international experts                                                           | ULTRASOUND MED BIOL            | 2020 |
| 144 | Pivetta E.         | Lung ultrasound for the diagnosis of SARS-CoV-2 pneumonia in the Emergency Department                                                                                                                            | ANN EMERG MED                  | 2020 |
| 145 | Poggiali E.        | Can Lung US Help Critical Care Clinicians in the Early Diagnosis of Novel Coronavirus (COVID-19) Pneumonia?                                                                                                      | RADIOLOGY                      | 2020 |
| 146 | Poggiali E.        | Triage decision-making at the time of COVID-19 infection/ the Piacenza strategy                                                                                                                                  | INTERN EM MED                  | 2020 |
| 147 | Qian F.            | A valuable and affordable handheld ultrasound in combating COVID-19                                                                                                                                              | CRIT CARE                      | 2020 |
| 148 | Qian-Yi P.         | Findings of lung ultrasonography of novel coronavirus pneumonia during the 2019-2020 epidemic                                                                                                                    | INTENSIVE CARE MED             | 2020 |
| 149 | Qian-Yi P.         | Using echocardiography to guide the treatment of novel coronavirus pneumonia                                                                                                                                     | CRIT CARE                      | 2020 |
| 150 | Rajkumar R.        | Point of Care Ultrasound During the Covid-19 Pandemic Should Screen for Inter-Atrial Shunt                                                                                                                       | ADVANCED ULTRASOUND DIAGN THER | 2020 |
| 151 | Reisinger N.       | Lung ultrasound/ a valuable tool for the assessment of dialysis patients with COVID-19                                                                                                                           | CLIN EXPERIM NEPHROL           | 2020 |
| 152 | Ren B.             | Extremely High Incidence of Lower Extremity Deep Venous Thrombosis in 48 Patients With Severe COVID-19 in Wuhan                                                                                                  | CIRCULATION                    | 2020 |
| 153 | Roth KR.           | Computed tomography and point-of-care ultrasound findings in 2 COVID-19 patients                                                                                                                                 | J AM COLL EM PHYS OPEN         | 2020 |
| 154 | Roy S.             | Deep Learning for Classification and Localization of COVID-19 Markers in Point-of-Care Lung Ultrasound                                                                                                           | IEEE TRANSCAT MED IMAGING 2020 | 2020 |
| 155 | Rubulotta F.       | Technologies to Optimize the Care of Severe Coronavirus Disease 2019 Patients for Health Care Providers Challenged by Limited Resources                                                                          | ANESTH ANALG                   | 2020 |
| 156 | Santiago M.        | Use of US to expedite diagnosis of PE in COVID-19 Patient                                                                                                                                                        | VISUAL J EM MED                | 2020 |
| 157 | Santoliquido A.    | Incidence of Deep Vein Thrombosis among non-ICU Patients Hospitalized for COVID-19 Despite Pharmacological Thromboprophylaxis                                                                                    | J THROMB HAEMOSTH              | 2020 |
| 158 | Schultz MJ.        | Challenges and Opportunities for Lung Ultrasound in Novel Coronavirus Disease (COVID-19)                                                                                                                         | AM J TROP MED HYG              | 2020 |
| 159 | Scopettuolo G.     | Vascular access in COVID-19 patients; Smart decisions for maximal safety                                                                                                                                         | J VASC ULTRASOUND              | 2020 |
| 160 | Shaw JA.           | Lung Ultrasound in COVID-19; Not Novel, but Necessary                                                                                                                                                            | RESPIRATION                    | 2020 |
| 161 | Shokoohi H.        | Lung ultrasound monitoring in patients with COVID-19 on home isolation                                                                                                                                           | AM J EM MED                    | 2020 |
| 162 | Shkachi R.         | Whole body point-of-care ultrasound for COVID-19/ a multi-system approach to a multi-system disease                                                                                                              | ANAESTHESIA                    | 2020 |
| 163 | Smallwood N.       | Should point-of-care ultrasound become part of healthcare worker testing for COVID?                                                                                                                              | ROYAL COLLEGE PHYS             | 2020 |
| 164 | Smargiassi A.      | Lung ultrasonography for early management of patients with respiratory symptoms during COVID-19 pandemic                                                                                                         | J ULTRASOUND                   | 2020 |
| 165 | Smith MJ.          | Point-of-care lung ultrasound in patients with COVID-19 – a narrative review                                                                                                                                     | ANAESTHESIA                    | 2020 |
| 166 | Soccorso S.        | Thoracic ultrasound and SARS-CoV-19; a pictorial essay                                                                                                                                                           | J ULTRASOUND                   | 2020 |
| 167 | Sohail S.          | Rational and practical use of imaging in COVID-19 pneumonia                                                                                                                                                      | PAK J MED SCI 2020             | 2020 |
| 168 | Soldati G.         | Contrast-Enhanced Ultrasound in Patients With COVID-19 Pneumonia, Acute Respiratory Distress Syndrome, or Something Else?                                                                                        | J ULTRASOUND MED               | 2020 |
| 169 | Soldati G.         | On Lung Ultrasound Patterns Specificity in the Management of COVID-19 Patients                                                                                                                                   | J ULTRASOUND MED               | 2020 |
| 170 | Soldati G.         | Proposal for international standardization of the use of lung ultrasound for COVID-19 patients; a simple, quantitative, reproducible method                                                                      | J ULTRASOUND MED               | 2020 |
| 171 | Sollazzo V.        | Echocardiographic Features in Patients with Critical COVID-19 Requiring Endotracheal Intubation                                                                                                                  | INTERN J CLIN SKILLS           | 2020 |
| 172 | Sperandeo M.       | Diagnosis of coronavirus disease 2019 pneumonia in pregnant women/ can we rely on lung ultrasound?                                                                                                               | AM J OBST                      | 2020 |
| 173 | Sperandeo M.       | Lung Ultrasound early detection and monitoring in Covid-19 Pneumonia/ fact and fiction.                                                                                                                          | QJM                            | 2020 |
| 174 | Sperandeo M.       | Lung Ultrasound in COVID-19 Patients – More Shadows Than Information – Letter to the Editor on the Article "W. LU et al. Ultrascall in Med. 2020 Apr 15                                                          | ULTRASCHALL MED                | 2020 |
| 175 | Sultan LR.         | A REVIEW OF EARLY EXPERIENCE IN LUNG ULTRASOUND IN THE DIAGNOSIS AND MANAGEMENT OF COVID-19                                                                                                                      | ULTRASOUND MED BIOL            | 2020 |
| 176 | Szabo AJ.          | Pathophysiological background and clinical practice of lung ultrasound in COVID-19 patients: A short review                                                                                                      | ANATOL J CARDIOL               | 2020 |
| 177 | Szekely Y.         | The Spectrum of Cardiac Manifestations in Coronavirus Disease 2019 (COVID-19) – a Systematic Echocardiographic Study                                                                                             | CIRCULATION                    | 2020 |
| 178 | Tan G.             | USE OF LUNG ULTRASOUND TO DIFFERENTIATE CORONAVIRUS DISEASE 2019 (COVID-19) PNEUMONIA FROM COMMUNITY-ACQUIRED PNEUMONIA                                                                                          | ULTRASOUND MED BIOL            | 2020 |
| 179 | Tavazzi G.         | Myocardial localization of coronavirus in COVID-19 cardiogenic shock                                                                                                                                             | EUR J HEART FAIL               | 2020 |
| 180 | Tavazzi G.         | Thrombotic events in SARS-CoV-2 patients; an urgent call for ultrasound screening                                                                                                                                | INTENSIVE CARE MED             | 2020 |
| 181 | Tee A.             | Contrast-enhanced ultrasound (CEUS) of the lung reveals multiple areas of microthrombi in a COVID-19 patient                                                                                                     | INTENSIVE CARE MED             | 2020 |
| 182 | Thalappilli R.     | POCUS to Guide Fluid Therapy in COVID-19                                                                                                                                                                         | J CARDIOTHORAC VASC ANESTH     | 2020 |
| 183 | Thomas A.          | Lung ultrasound findings in a 64-year-old woman with COVID-19                                                                                                                                                    | CMAJ                           | 2020 |
| 184 | Trauer MM.         | Utility of Lung Ultrasound in COVID-19; A Systematic Scoping Review                                                                                                                                              | medRxiv                        | 2020 |
| 185 | Trimaille A.       | Venous thromboembolism in non-critically ill patients with COVID-19 infection                                                                                                                                    | THROMB RES                     | 2020 |
| 186 | Trovato GM.        | Usefulness of lung ultrasound imaging in COVID-19 pneumonia/ The persisting need of safety and evidences                                                                                                         | ECHOCARDIOGRAPHY               | 2020 |
| 187 | Tung Chen Y.       | Acute pericarditis due to COVID-19 infection; An underdiagnosed disease?                                                                                                                                         | MED CLIN                       | 2020 |
| 188 | Tung Chen Y.       | CORRELATION BETWEEN CHEST COMPUTED TOMOGRAPHY AND LUNG ULTRASONOGRAPHY IN PATIENTS WITH CORONAVIRUS DISEASE 2019 (COVID-19)                                                                                      | medRxiv                        | 2020 |
| 189 | Tung Chen Y.       | Lung ultrasound in the monitoring of COVID-19 infection                                                                                                                                                          | CLIN MED                       | 2020 |
| 190 | Tung-Chen Y.       | THE ROLE OF POINT-OF-CARE ULTRASONOGRAPHY IN THE INITIAL CHARACTERIZATION OF COVID-19 PATIENTS/ RESULTS FROM A PROSPECTIVE MULTICENTRIC STUDY                                                                    | medRxiv                        | 2020 |
| 191 | Vetrugno L.        | B lines in COVID-19/ "Unspecificity" is not "meaningless"                                                                                                                                                        | ECHOCARDIOGRAPHY               | 2020 |
| 192 | Vetrugno L.        | Lung Ultrasound and the COVID-19 "Pattern" Not All That Glitters Today Is Gold Tomorrow                                                                                                                          | J ULTRASOUND MED               | 2020 |
| 193 | Vetrugno L.        | Our Italian experience using lung ultrasound for identification, grading and serial follow-up of severity of lung involvement for management of patients with COVID-19                                           | ECHOCARDIOGRAPHY               | 2020 |
| 194 | Vieira ALS.        | Role of point-of-care ultrasound during the COVID-19 pandemic; our recommendations in the management of dialytic patients                                                                                        | ULTRASOUND J                   | 2020 |
| 195 | Volpicelli G.      | Sonographic signs and patterns of COVID-19 pneumonia                                                                                                                                                             | ULTRASOUND J                   | 2020 |
| 196 | Volpicelli G.      | What's new in lung ultrasound during the COVID-19 pandemic                                                                                                                                                       | INTENSIVE CARE MED             | 2020 |
| 197 | Walsh P.           | PoCUS is useful when screening for CoVID-19 in ED patients                                                                                                                                                       | medRxiv                        | 2020 |
| 198 | Wan DY.            | Current practice and potential pharmacy in diagnosing COVID-19                                                                                                                                                   | EUR REV MED PHARMACOL SCI      | 2020 |
| 199 | Wang E.            | Chinese Association of Anesthesiologists Expert Consensus on the Use of Perioperative Ultrasound in Coronavirus Disease 2019 Patients                                                                            | J CARDIOTHOR VASC ANESTH       | 2020 |
| 200 | Ward RP.           | Utilization and Appropriateness of Transthoracic Echocardiography in Response to the COVID-19 Pandemic                                                                                                           | JASE                           | 2020 |
| 201 | Wong A.            | Ultrasound in Times of COVID-19                                                                                                                                                                                  | HEALTHCARE MANAGEMENT          | 2020 |
| 202 | Xing C.            | Lung ultrasound findings in patients with COVID-19 pneumonia                                                                                                                                                     | CRIT CARE                      | 2020 |
| 203 | Yang Y.            | Lung ultrasonography versus chest CT in COVID-19 pneumonia; a two-centered retrospective comparison study from China                                                                                             | INTENSIVE CARE MED             | 2020 |
| 204 | Yassa M.           | Lung Ultrasound Can Influence the Clinical Treatment of Pregnant Women With COVID-19                                                                                                                             | J ULTRASOUND MED               | 2020 |
| 205 | Yasukawa K.        | Point-of-Care Lung Ultrasound Findings in Patients with COVID-19 Pneumonia                                                                                                                                       | AM J TROP MED                  | 2020 |
| 206 | Ye R.              | Feasibility of a 5G-based robot-assisted remote ultrasound system for cardiopulmonary assessment of COVID-19 patients                                                                                            | CHEST                          | 2020 |
| 207 | Yusuf GT.          | The use of contrast-enhanced ultrasound in COVID-19 lung imaging                                                                                                                                                 | J ULTRASOUND                   | 2020 |
| 208 | Youssef A.         | Lung ultrasound in the coronavirus disease 2019 pandemic/ a practical guide for obstetricians and gynecologists                                                                                                  | AM J OBST GYN                  | 2020 |
| 209 | Zeng JH.           | First case of COVID-19 complicated with fulminant myocarditis; a case report and insights                                                                                                                        | INFECTION                      | 2020 |
| 210 | Zhang L.           | Deep Vein Thrombosis in Hospitalized Patients With COVID-19 in Wuhan, China                                                                                                                                      | CIRCULATION                    | 2020 |
| 211 | Zhang L.           | Bedside Focused Cardiac Ultrasound in COVID-19 from the Wuhan Epicenter; The Role of Cardiac Point-of-Care Ultrasound, Limited Transthoracic Echocardiography, and Critical Care Echocardiography                | JASE                           | 2020 |
| 212 | Zielecki L.        | Comparative study of lung ultrasound and chest computed tomography scan in the assessment of severity of confirmed COVID-19 pneumonia                                                                            | INTENSIVE CARE MED             | 2020 |
| 213 | Zielecki L.        | Ultrasound findings in patients with COVID-19 pneumonia in early and late stages; Two case-report                                                                                                                | ANESTH CRIT CARE PAIN MED      | 2020 |
| 214 | Zotzmann V.        | Are subpleural consolidations indicators for segmental pulmonary embolism in COVID-19?                                                                                                                           | INTENSIVE CARE MED             | 2020 |
